# Supplementary material for: Mycobacteria-Specific Mono- and Polyfunctional CD4+ T Cell Profiles in Children With Latent and Active Tuberculosis: A Prospective Proof-of-Concept Study
Source: PubMed Central journal article supplement (PMC6459895; doi:10.3389/fimmu.2019.00431), 2019-04-05
Supplement: Table_1.pdf [file Table_1.pdf]

**Supplementary Table 1. Median proportions and interquartile ranges of mycobacteria-specific mono- and polyfunctional CD4+ T cells in the three diagnostic groups according to antigenic stimulant.** The values shown in the last three columns were calculated by Mann Whitney *U* tests; statistically significant Mann Whitney *U* p-values ( $p < 0.05$ ) are highlighted in red.

| Stimulant | Cytokine(s) produced                     | Median percentage (IQR) |                        |                        | Kruskal Wallis p-value | Un-infected vs. LTBI | Un-infected vs. Active TB | LTBI vs. Active TB |
|-----------|------------------------------------------|-------------------------|------------------------|------------------------|------------------------|----------------------|---------------------------|--------------------|
|           |                                          | Un-infected             | LTBI                   | Active TB              |                        |                      |                           |                    |
| ESAT-6    | IFN- $\gamma$ (single)                   | 0.005<br>(0.001-0.020)  | 0.012<br>(0.000-0.040) | 0.053<br>(0.080-0.185) | 0.0867                 | 0.2870               | 0.0163                    | 0.1317             |
|           | IL-2 (single)                            | 0.000<br>(0.000-0.007)  | 0.005<br>(0.000-0.017) | 0.005<br>(0.000-0.020) | 0.3409                 | -                    | -                         | -                  |
|           | TNF- $\alpha$ (single)                   | 0.000<br>(0.000-0.004)  | 0.010<br>(0.000-0.040) | 0.078<br>(0.018-0.147) | < 0.0001               | 0.0077               | < 0.0001                  | 0.0377             |
|           | IL-17 (single)                           | 0.000<br>(0.000-0.003)  | 0.000<br>(0.000-0.009) | 0.001<br>(0.000-0.048) | 0.2764                 | -                    | -                         | -                  |
|           | IFN- $\gamma$ /IL-2                      | 0.000<br>(0.000-0.000)  | 0.000<br>(0.000-0.000) | 0.000<br>(0.000-0.000) | §                      | -                    | -                         | -                  |
|           | IFN- $\gamma$ /TNF- $\alpha$             | 0.000<br>(0.000-0.000)  | 0.002<br>(0.000-0.004) | 0.015<br>(0.003-0.035) | < 0.0001               | 0.0020               | < 0.0001                  | 0.0146             |
|           | IFN- $\gamma$ /IL-17                     | 0.000<br>(0.000-0.000)  | 0.000<br>(0.000-0.002) | 0.000<br>(0.000-0.002) | §                      | -                    | -                         | -                  |
|           | IL-2/TNF- $\alpha$                       | 0.000<br>(0.000-0.001)  | 0.000<br>(0.000-0.005) | 0.005<br>(0.000-0.022) | 0.0491                 | 0.0379               | 0.0281                    | 0.2916             |
|           | IL-2/IL-17                               | 0.000<br>(0.000-0.001)  | 0.000<br>(0.000-0.000) | 0.002<br>(0.000-0.009) | §                      | -                    | -                         | -                  |
|           | TNF- $\alpha$ /IL-17                     | 0.000<br>(0.000-0.000)  | 0.000<br>(0.000-0.000) | 0.001<br>(0.000-0.007) | §                      | -                    | -                         | -                  |
|           | IFN- $\gamma$ /IL-2/TNF- $\alpha$        | 0.000<br>(0.000-0.000)  | 0.003<br>(0.000-0.005) | 0.007<br>(0.002-0.020) | §                      | -                    | -                         | -                  |
|           | IFN- $\gamma$ /IL-2/IL-17                | 0.000<br>(0.000-0.000)  | 0.000<br>(0.000-0.000) | 0.000<br>(0.000-0.001) | §                      | -                    | -                         | -                  |
|           | IFN- $\gamma$ /TNF- $\alpha$ /IL-17      | 0.000<br>(0.000-0.000)  | 0.000<br>(0.000-0.000) | 0.000<br>(0.000-0.005) | §                      | -                    | -                         | -                  |
|           | IL-2/TNF- $\alpha$ /IL-17                | 0.000<br>(0.000-0.000)  | 0.000<br>(0.000-0.000) | 0.000<br>(0.000-0.009) | §                      | -                    | -                         | -                  |
|           | IFN- $\gamma$ /IL-2/TNF- $\alpha$ /IL-17 | 0.000<br>(0.000-0.000)  | 0.000<br>(0.000-0.000) | 0.000<br>(0.000-0.002) | §                      | -                    | -                         | -                  |
| CFP-10    | IFN- $\gamma$ (single)                   | 0.010<br>(0.000-0.020)  | 0.010<br>(0.000-0.030) | 0.022<br>(0.007-0.043) | 0.3370                 | -                    | -                         | -                  |
|           | IL-2 (single)                            | 0.000<br>(0.000-0.006)  | 0.000<br>(0.000-0.020) | 0.015<br>(0.007-0.022) | 0.0446                 | 0.3986               | 0.0065                    | 0.0962             |
|           | TNF- $\alpha$ (single)                   | 0.000<br>(0.000-0.006)  | 0.010<br>(0.000-0.030) | 0.025<br>(0.018-0.150) | < 0.0001               | 0.0008               | < 0.0001                  | 0.1477             |
|           | IL-17 (single)                           | 0.000<br>(0.000-0.007)  | 0.000<br>(0.000-0.001) | 0.003<br>(0.000-0.038) | 0.2434                 | -                    | -                         | -                  |
|           | IFN- $\gamma$ /IL-2                      | 0.000<br>(0.000-0.000)  | 0.000<br>(0.000-0.000) | 0.000<br>(0.000-0.000) | §                      | -                    | -                         | -                  |
|           | IFN- $\gamma$ /TNF- $\alpha$             | 0.000<br>(0.000-0.001)  | 0.002<br>(0.000-0.004) | 0.005<br>(0.003-0.010) | 0.0029                 | 0.0381               | 0.0022                    | 0.1384             |
|           | IFN- $\gamma$ /IL-17                     | 0.000<br>(0.000-0.000)  | 0.000<br>(0.000-0.000) | 0.000<br>(0.000-0.002) | §                      | -                    | -                         | -                  |
|           | IL-2/TNF- $\alpha$                       | 0.000<br>(0.000-0.001)  | 0.001<br>(0.000-0.004) | 0.000<br>(0.000-0.010) | 0.2263                 | -                    | -                         | -                  |
|           | IL-2/IL-17                               | 0.000<br>(0.000-0.001)  | 0.000<br>(0.000-0.000) | 0.002<br>(0.000-0.009) | §                      | -                    | -                         | -                  |
|           | TNF- $\alpha$ /IL-17                     | 0.000<br>(0.000-0.001)  | 0.000<br>(0.000-0.000) | 0.000<br>(0.000-0.003) | §                      | -                    | -                         | -                  |
|           | IFN- $\gamma$ /IL-2/TNF- $\alpha$        | 0.000<br>(0.000-0.000)  | 0.001<br>(0.000-0.004) | 0.003<br>(0.000-0.008) | < 0.0001               | < 0.0001             | < 0.0001                  | 0.6028             |
|           | IFN- $\gamma$ /IL-2/IL-17                | 0.000<br>(0.000-0.000)  | 0.000<br>(0.000-0.000) | 0.000<br>(0.000-0.001) | §                      | -                    | -                         | -                  |
|           | IFN- $\gamma$ /TNF- $\alpha$ /IL-17      | 0.000<br>(0.000-0.000)  | 0.000<br>(0.000-0.000) | 0.000<br>(0.000-0.001) | §                      | -                    | -                         | -                  |
|           | IL-2/TNF- $\alpha$ /IL-17                | 0.000<br>(0.000-0.000)  | 0.000<br>(0.000-0.000) | 0.002<br>(0.000-0.007) | §                      | -                    | -                         | -                  |
|           | IFN- $\gamma$ /IL-2/TNF- $\alpha$ /IL-17 | 0.000<br>(0.000-0.000)  | 0.000<br>(0.000-0.000) | 0.000<br>(0.000-0.000) | §                      | -                    | -                         | -                  |

§ Insufficient number of unique values to calculate valid p-value.

Tebruegge M et al. Mycobacteria-specific mono- and polyfunctional CD4+ T cell profiles in children with latent and active tuberculosis: a prospective proof-of-concept study.

| Stimulant | Cytokine(s) produced                     | Median percentage (IQR) |                        |                        | Kruskal Wallis p-value | Un-infected vs. LTBI | Un-infected vs. Active TB | LTBI vs. Active TB |
|-----------|------------------------------------------|-------------------------|------------------------|------------------------|------------------------|----------------------|---------------------------|--------------------|
|           |                                          | Un-infected             | LTBI                   | Active TB              |                        |                      |                           |                    |
| PPD       | IFN- $\gamma$ (single)                   | 0.000<br>(0.000-0.010)  | 0.090<br>(0.020-0.464) | 0.450<br>(0.298-1.702) | < 0.0001               | < 0.0001             | < 0.0001                  | 0.0239             |
|           | IL-2 (single)                            | 0.010<br>(0.000-0.016)  | 0.030<br>(0.006-0.050) | 0.040<br>(0.037-0.080) | 0.0003                 | 0.0051               | 0.0002                    | 0.1095             |
|           | TNF- $\alpha$ (single)                   | 0.005<br>(0.000-0.021)  | 0.110<br>(0.070-0.230) | 0.463<br>(0.276-1.010) | < 0.0001               | < 0.0001             | < 0.0001                  | 0.0050             |
|           | IL-17 (single)                           | 0.004<br>(0.000-0.020)  | 0.010<br>(0.000-0.030) | 0.025<br>(0.006-0.162) | 0.0734                 | 0.1636               | 0.0313                    | 0.3082             |
|           | IFN- $\gamma$ /IL-2                      | 0.000<br>(0.000-0.000)  | 0.004<br>(0.000-0.009) | 0.004<br>(0.000-0.020) | §                      | -                    | -                         | -                  |
|           | IFN- $\gamma$ /TNF- $\alpha$             | 0.000<br>(0.000-0.004)  | 0.040<br>(0.004-0.140) | 0.258<br>(0.217-0.800) | < 0.0001               | < 0.0001             | < 0.0001                  | 0.0035             |
|           | IFN- $\gamma$ /IL-17                     | 0.000<br>(0.000-0.000)  | 0.000<br>(0.000-0.000) | 0.000<br>(0.000-0.013) | §                      | -                    | -                         | -                  |
|           | IL-2/TNF- $\alpha$                       | 0.002<br>(0.000-0.005)  | 0.024<br>(0.010-0.042) | 0.057<br>(0.029-0.217) | < 0.0001               | < 0.0001             | < 0.0001                  | 0.2126             |
|           | IL-2/IL-17                               | 0.000<br>(0.000-0.004)  | 0.000<br>(0.000-0.009) | 0.027<br>(0.008-0.034) | 0.0006                 | 0.7456               | 0.0002                    | 0.1870             |
|           | TNF- $\alpha$ /IL-17                     | 0.000<br>(0.000-0.003)  | 0.000<br>(0.000-0.005) | 0.020<br>(0.004-0.023) | 0.0011                 | 0.4198               | < 0.0001                  | 0.0065             |
|           | IFN- $\gamma$ /IL-2/TNF- $\alpha$        | 0.000<br>(0.000-0.001)  | 0.020<br>(0.009-0.120) | 0.060<br>(0.027-0.427) | < 0.0001               | < 0.0001             | < 0.0001                  | 0.0712             |
|           | IFN- $\gamma$ /IL-2/IL-17                | 0.000<br>(0.000-0.000)  | 0.000<br>(0.000-0.000) | 0.000<br>(0.000-0.000) | §                      | -                    | -                         | -                  |
|           | IFN- $\gamma$ /TNF- $\alpha$ /IL-17      | 0.000<br>(0.000-0.000)  | 0.000<br>(0.000-0.000) | 0.000<br>(0.000-0.001) | §                      | -                    | -                         | -                  |
|           | IL-2/TNF- $\alpha$ /IL-17                | 0.000<br>(0.000-0.002)  | 0.003<br>(0.000-0.018) | 0.030<br>(0.002-0.035) | 0.0008                 | 0.0329               | 0.0024                    | 0.0871             |
|           | IFN- $\gamma$ /IL-2/TNF- $\alpha$ /IL-17 | 0.000<br>(0.000-0.000)  | 0.000<br>(0.000-0.000) | 0.000<br>(0.000-0.002) | §                      | -                    | -                         | -                  |
| MTBk      | IFN- $\gamma$ (single)                   | 0.007<br>(0.000-0.024)  | 0.285<br>(0.012-0.920) | 0.593<br>(0.243-1.135) | < 0.0001               | < 0.0001             | < 0.0001                  | 0.3114             |
|           | IL-2 (single)                            | 0.022<br>(0.010-0.060)  | 0.087<br>(0.030-0.141) | 0.130<br>(0.040-0.193) | 0.0023                 | 0.0012               | 0.0193                    | 0.5590             |
|           | TNF- $\alpha$ (single)                   | 0.026<br>(0.010-0.048)  | 0.090<br>(0.070-0.180) | 0.243<br>(0.136-0.557) | < 0.0001               | < 0.0001             | < 0.0001                  | 0.0354             |
|           | IL-17 (single)                           | 0.056<br>(0.030-0.098)  | 0.120<br>(0.080-0.180) | 0.510<br>(0.153-0.890) | < 0.0001               | 0.0033               | 0.0005                    | 0.0175             |
|           | IFN- $\gamma$ /IL-2                      | 0.000<br>(0.000-0.000)  | 0.000<br>(0.000-0.002) | 0.002<br>(0.000-0.005) | §                      | -                    | -                         | -                  |
|           | IFN- $\gamma$ /TNF- $\alpha$             | 0.000<br>(0.000-0.002)  | 0.040<br>(0.009-0.120) | 0.120<br>(0.054-0.370) | < 0.0001               | < 0.0001             | < 0.0001                  | 0.1016             |
|           | IFN- $\gamma$ /IL-17                     | 0.000<br>(0.000-0.000)  | 0.000<br>(0.000-0.002) | 0.000<br>(0.000-0.017) | §                      | -                    | -                         | -                  |
|           | IL-2/TNF- $\alpha$                       | 0.006<br>(0.001-0.010)  | 0.020<br>(0.010-0.060) | 0.038<br>(0.030-0.064) | 0.0001                 | 0.0030               | 0.0004                    | 0.1599             |
|           | IL-2/IL-17                               | 0.028<br>(0.008-0.051)  | 0.049<br>(0.023-0.110) | 0.170<br>(0.069-0.317) | 0.0072                 | 0.0166               | 0.0073                    | 0.0732             |
|           | TNF- $\alpha$ /IL-17                     | 0.005<br>(0.001-0.019)  | 0.010<br>(0.003-0.020) | 0.029<br>(0.011-0.062) | 0.0695                 | 0.3819               | 0.0091                    | 0.0512             |
|           | IFN- $\gamma$ /IL-2/TNF- $\alpha$        | 0.000<br>(0.000-0.000)  | 0.003<br>(0.000-0.010) | 0.008<br>(0.003-0.053) | §                      | -                    | -                         | -                  |
|           | IFN- $\gamma$ /IL-2/IL-17                | 0.000<br>(0.000-0.000)  | 0.000<br>(0.000-0.000) | 0.001<br>(0.000-0.003) | §                      | -                    | -                         | -                  |
|           | IFN- $\gamma$ /TNF- $\alpha$ /IL-17      | 0.000<br>(0.000-0.000)  | 0.000<br>(0.000-0.001) | 0.000<br>(0.000-0.005) | §                      | -                    | -                         | -                  |
|           | IL-2/TNF- $\alpha$ /IL-17                | 0.008<br>(0.001-0.024)  | 0.030<br>(0.010-0.050) | 0.080<br>(0.015-0.143) | 0.0058                 | 0.0088               | 0.0210                    | 0.2424             |
|           | IFN- $\gamma$ /IL-2/TNF- $\alpha$ /IL-17 | 0.000<br>(0.000-0.000)  | 0.000<br>(0.000-0.000) | 0.001<br>(0.000-0.004) | §                      | -                    | -                         | -                  |

§ Insufficient number of unique values to calculate valid p-value.
